# Supplementary material for: Crystal Structures of the GCaMP Calcium Sensor Reveal the Mechanism of Fluorescence Signal Change and Aid Rational Design
Source: PubMed Central journal article supplement — J Biol Chem. 2009 Mar 6;284(10):6455–64. doi: 10.1074/jbc.M807657200 (PMC2649101; doi:10.1074/jbc.m807657200), 2009-03-06

## Supplemental Figure Legends

**Fig. S1.** Electron density maps of GCaMP2 structures. Portions of the  $2F_o-F_c$  electron density map corresponding to the chromophore-containing central helix of the cpEGFP domain, contoured at  $1.5 \sigma$ , are displayed on a stick representation of this region of each structure. The rest of the cpEGFP barrel is displayed as semitransparent ribbons for context.

**Fig. S2.** Estimation of intracellular [GCaMP2]. The mean fluorescence intensity of purified GCaMP2 (red) and GCaMP2 expressing neurons (black) at 10% and 20% laser power. Dark current was subtracted from each measurement. The eight recorded neurons have a range of estimated intracellular GCaMP2 concentrations of  $6.25 \mu\text{M}$  to  $16.15 \mu\text{M}$ , a mean of  $10.04 \mu\text{M}$  and standard deviation of  $3.30 \mu\text{M}$ .

**Fig. S3.** SEC of a concentration series of  $\text{Ca}^{2+}$ -saturated GCaMP2 demonstrating the relative proportion of dimeric species as a function of total GCaMP2 concentration. The maximum peak height of the monomer peak was used to normalize each chromatogram. Total GCaMP2 concentrations are displayed to the right.

**Fig. S4.** SEC analysis of GCaMP2 mutants designed to disrupt dimerization. The maximum peak height of the monomer peak was used to normalize each chromatogram. The full normalized monomer peaks are displayed in the inset. Mutations analyzed are labeled at right. Refer to Supplemental Table 2 for details of each dimer disruption mutation tested.

**Fig. S5.** Topology diagram of GCaMP2 structure. Secondary structure elements are colored by domain and labeled. The calcium-binding sites of CaM are indicated by asterisks. The chromophore of cpEGFP is shown as black lines in the middle of helix  $\alpha_2$ .

**Fig. S6.** Sequence of GCaMP2 with both GCaMP2 numbering (top) and numbering according to EGFP, CaM and M13-peptide (bottom). Sequence of EGF, CaM and M13-domains is in italics, pRSET expression tag and linker sequence is in regular font style. Extent of GCaMP2 domains is indicated above the sequence.

**Fig. S7.** CaM-cpEGFP domain interfaces. A semitransparent surface in purple (for intramolecular contacts) or green (from intermolecular contacts in the dimer) is displayed for atoms of the cpEGFP domain within  $4 \text{ \AA}$  of the CaM domain. The cpEGFP domain of each structure is displayed as a grey cartoon, with the chromophore represented as sticks.

**Fig. S8.** Comparison of GCaMP2 domains with previous structures. (A) The cpEGFP domain of each of the GCaMP2 structures determined here is represented as blue ribbons superimposed on the original GFP structure (PDB ID: 1EMA, green). (B) The CaM-M13 domain of each of the  $\text{Ca}^{2+}$ -saturated dimer (orange) and  $\text{Ca}^{2+}$ -saturated monomer (blue) structures are shown superimposed on the original CaM-M13 structure (PDB ID: 1CDL).

The M13 peptide, as well as the N-terminal and C-terminal lobes of CaM are labeled, and the inter-lobe linker of CaM is indicated with an asterisk.

**Fig. S9.** Excitation, emission and absorbance scans of GCaMP2, GCaMP2-T116V and the mutants described in Table S4 and Figure 3. All of the GCaMP2 mutants also contain the T116V mutation. Scans are normalized to the largest peak in the spectrum.

**Fig. S10.** Stereoview comparison of the M13-cpEGFP linker in Ca<sup>2+</sup>-saturated monomer (purple), Ca<sup>2+</sup>-saturated dimer (cyan), and Ca<sup>2+</sup>-free (green) GCaMP2. The Leu61 and Glu61 sidechains of the M13-cpEGFP linker are represented as sticks. Glu61 (denoted by asterisk) is hydrogen bonded (dashed black line) to the backbone amide nitrogen of Arg81 (also represented as sticks).

Fig. S1

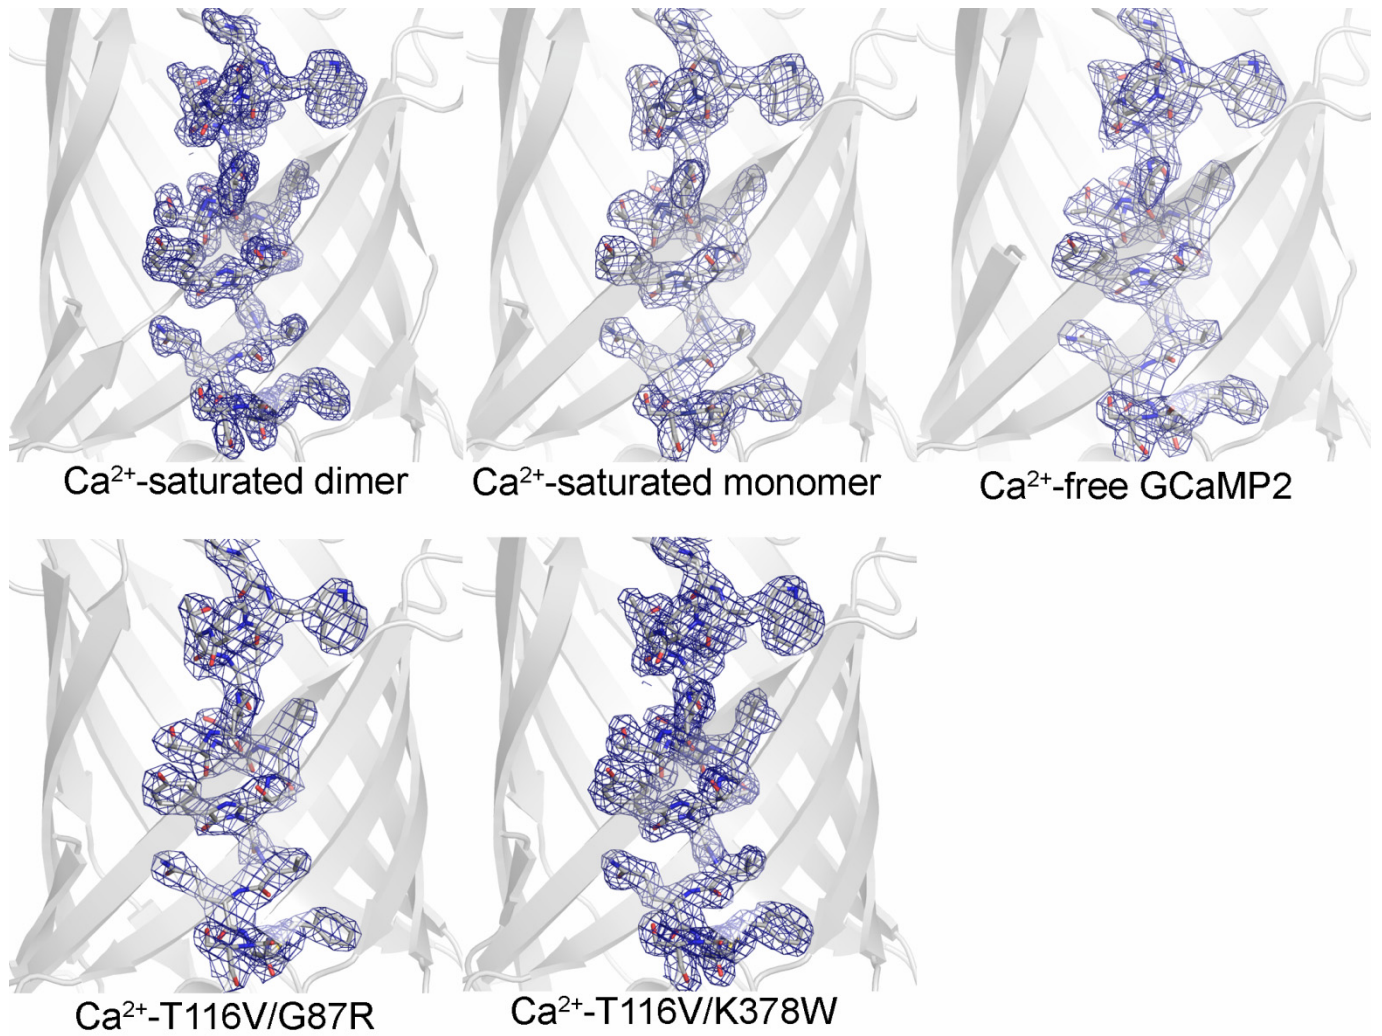

Fig. S2

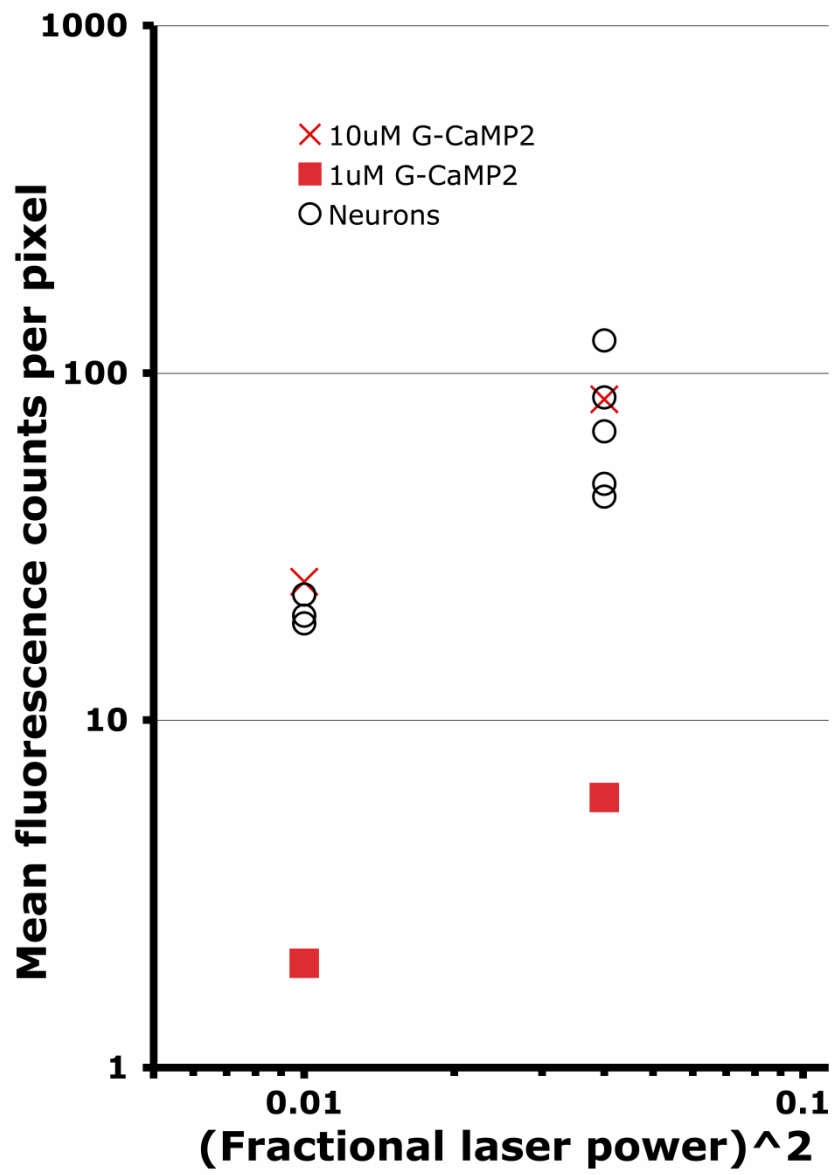



Fig. S4

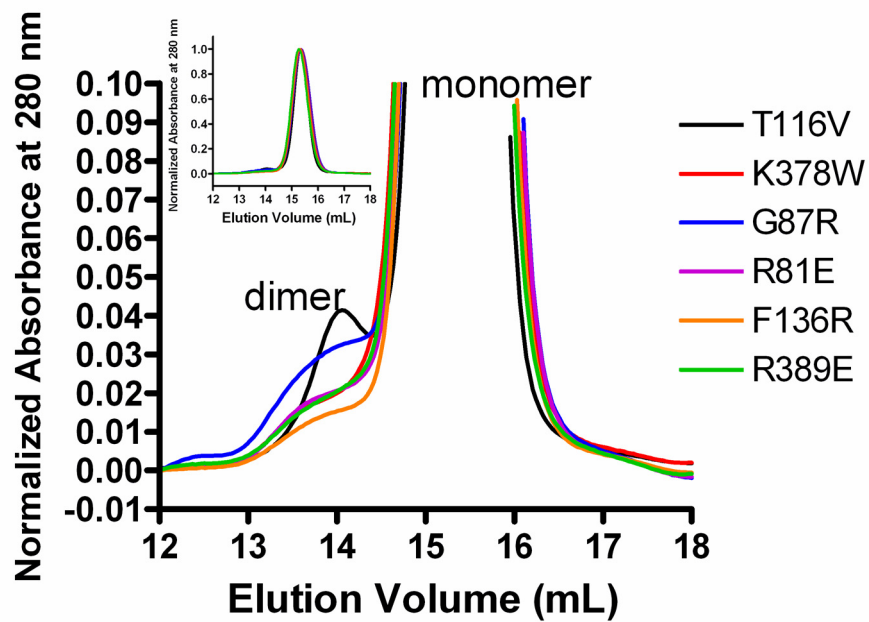

Fig. S5

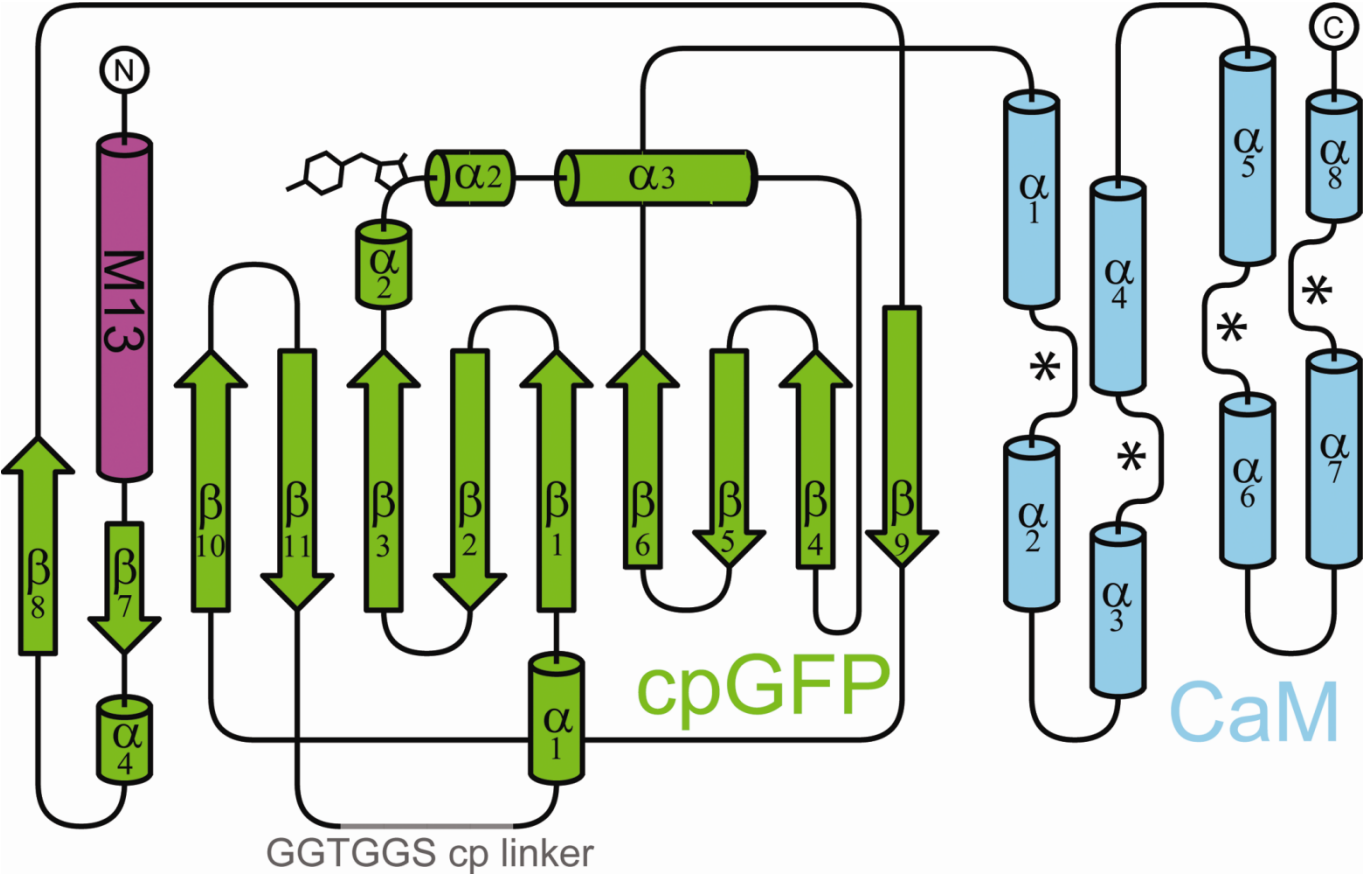

# Fig. S6

|          |      |                                                                                                                                                                                                                                                                  |     |     |     |     |     |                         |  |  |  |  |  |  |  |
|----------|------|------------------------------------------------------------------------------------------------------------------------------------------------------------------------------------------------------------------------------------------------------------------|-----|-----|-----|-----|-----|-------------------------|--|--|--|--|--|--|--|
|          |      | pRSET A Tag                                                                                                                                                                                                                                                      |     |     |     |     |     | M13 Peptide             |  |  |  |  |  |  |  |
| Normal   | num. | 1                                                                                                                                                                                                                                                                | 10  | 20  | 30  | 40  | 50  | 60                      |  |  |  |  |  |  |  |
| GCaMP2   |      | MRGSHHHHHHGSMASMTGGQQMGRDLYDDDDKDLATMVDS <b>S</b> RRKWNKTGH <b>A</b> VRAIGRL <b>S</b> SL                                                                                                                                                                         |     |     |     |     |     |                         |  |  |  |  |  |  |  |
| EGFP/CaM | num. | *****1*****10*****20**                                                                                                                                                                                                                                           |     |     |     |     |     |                         |  |  |  |  |  |  |  |
|          |      | cpEGFP, C-terminal half                                                                                                                                                                                                                                          |     |     |     |     |     |                         |  |  |  |  |  |  |  |
| Normal   | num. | 61                                                                                                                                                                                                                                                               | 70  | 80  | 90  | 100 | 110 | 120                     |  |  |  |  |  |  |  |
| GCaMP2   |      | ENVYIMADK <b>Q</b> KNGIKANFK <b>I</b> RHNIEDGGV <b>Q</b> LAYHY <b>Q</b> NT <b>P</b> IGDGPVLL <b>P</b> DNHYLST <b>Q</b> SK <b>L</b>                                                                                                                               |     |     |     |     |     |                         |  |  |  |  |  |  |  |
| EGFP/CaM | num. | 149*****160*****170*****180*****190*****200*****                                                                                                                                                                                                                 |     |     |     |     |     |                         |  |  |  |  |  |  |  |
|          |      | cpEGFP, C-terminal half                                                                                                                                                                                                                                          |     |     |     |     |     | cpEGFP, N-terminal half |  |  |  |  |  |  |  |
| Normal   | num. | 121                                                                                                                                                                                                                                                              | 130 | 140 | 150 | 160 | 170 | 180                     |  |  |  |  |  |  |  |
| GCaMP2   |      | SKDPNEKR <b>D</b> HMVLL <b>E</b> FVTA <b>A</b> GITLGM <b>D</b> E <b>L</b> YKGGTGGSMV <b>S</b> KGEELFTGV <b>V</b> PILVELDGD <b>V</b>                                                                                                                              |     |     |     |     |     |                         |  |  |  |  |  |  |  |
| EGFP/CaM | num. | 210*****220*****230*****238*****1*****10*****20**                                                                                                                                                                                                                |     |     |     |     |     |                         |  |  |  |  |  |  |  |
|          |      | cpEGFP, N-terminal half                                                                                                                                                                                                                                          |     |     |     |     |     |                         |  |  |  |  |  |  |  |
| Normal   | num. | 181                                                                                                                                                                                                                                                              | 190 | 200 | 210 | 220 | 230 | 240                     |  |  |  |  |  |  |  |
| GCaMP2   |      | NGHKFSV <b>S</b> GE <b>G</b> EGDATY <b>G</b> K <b>L</b> TLKFICT <b>T</b> G <b>K</b> LPV <b>P</b> WPTLV <b>T</b> TLTYGV <b>Q</b> CF <b>S</b> RY <b>P</b> DHMK <b>Q</b> H <b>D</b>                                                                                 |     |     |     |     |     |                         |  |  |  |  |  |  |  |
| EGFP/CaM | num. | *****30*****40*****50*****60*****70*****80**                                                                                                                                                                                                                     |     |     |     |     |     |                         |  |  |  |  |  |  |  |
|          |      | cpEGFP, N-terminal half                                                                                                                                                                                                                                          |     |     |     |     |     |                         |  |  |  |  |  |  |  |
| Normal   | num. | 241                                                                                                                                                                                                                                                              | 250 | 260 | 270 | 280 | 290 | 300                     |  |  |  |  |  |  |  |
| GCaMP2   |      | FFKSAMPE <b>G</b> Y <b>I</b> Q <b>E</b> RT <b>I</b> FF <b>K</b> DDGNYK <b>T</b> RAE <b>V</b> KFEGDTLV <b>N</b> RIELK <b>G</b> ID <b>F</b> K <b>E</b> DGNILGH <b>K</b> L <b>E</b>                                                                                 |     |     |     |     |     |                         |  |  |  |  |  |  |  |
| EGFP/CaM | num. | *****90*****100*****110*****120*****130*****140**                                                                                                                                                                                                                |     |     |     |     |     |                         |  |  |  |  |  |  |  |
|          |      |                                                                                                                                                                                                                                                                  | CaM |     |     |     |     |                         |  |  |  |  |  |  |  |
| Normal   | num. | 301                                                                                                                                                                                                                                                              | 310 | 320 | 330 | 340 | 350 | 360                     |  |  |  |  |  |  |  |
| GCaMP2   |      | YNTRD <b>Q</b> L <b>T</b> E <b>E</b> Q <b>I</b> A <b>E</b> F <b>K</b> E <b>A</b> F <b>S</b> L <b>F</b> DKDGD <b>G</b> T <b>I</b> TKEL <b>G</b> T <b>V</b> M <b>R</b> SL <b>G</b> Q <b>N</b> P <b>T</b> E <b>A</b> E <b>L</b> Q <b>D</b> MINE <b>V</b> D <b>A</b> |     |     |     |     |     |                         |  |  |  |  |  |  |  |
| EGFP/CaM | num. | 144*2*****10*****20*****30*****40*****50*****                                                                                                                                                                                                                    |     |     |     |     |     |                         |  |  |  |  |  |  |  |
|          |      | CaM                                                                                                                                                                                                                                                              |     |     |     |     |     |                         |  |  |  |  |  |  |  |
| Normal   | num. | 361                                                                                                                                                                                                                                                              | 370 | 380 | 390 | 400 | 410 | 420                     |  |  |  |  |  |  |  |
| GCaMP2   |      | DGNGTID <b>F</b> P <b>E</b> FLTMMARK <b>M</b> KD <b>T</b> DSE <b>E</b> E <b>I</b> R <b>E</b> AFRV <b>F</b> DKD <b>G</b> NGY <b>I</b> S <b>A</b> E <b>L</b> R <b>H</b> VMTNL <b>G</b> E <b>K</b> L <b>T</b>                                                       |     |     |     |     |     |                         |  |  |  |  |  |  |  |
| EGFP/CaM | num. | *60*****70*****80*****90*****100*****110*****                                                                                                                                                                                                                    |     |     |     |     |     |                         |  |  |  |  |  |  |  |
|          |      | CaM                                                                                                                                                                                                                                                              |     |     |     |     |     |                         |  |  |  |  |  |  |  |
| Normal   | num. | 421                                                                                                                                                                                                                                                              | 430 | 440 | 450 |     |     |                         |  |  |  |  |  |  |  |
| GCaMP2   |      | DEEV <b>D</b> E <b>M</b> I <b>R</b> E <b>A</b> D <b>I</b> D <b>G</b> D <b>G</b> Q <b>V</b> N <b>Y</b> E <b>E</b> F <b>V</b> Q <b>M</b> M <b>T</b> A <b>K</b>                                                                                                     |     |     |     |     |     |                         |  |  |  |  |  |  |  |
| EGFP/CaM | num. | 120*****130*****140*****148                                                                                                                                                                                                                                      |     |     |     |     |     |                         |  |  |  |  |  |  |  |



Fig. S7

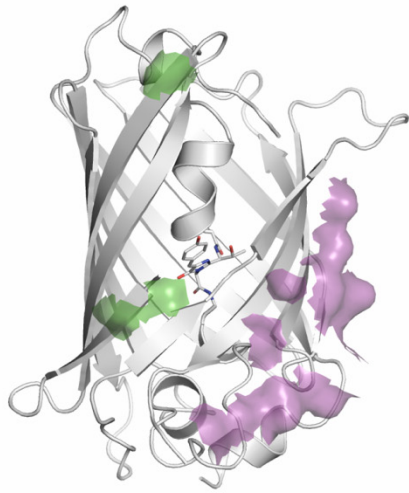

Ca<sup>2+</sup>-saturated dimer

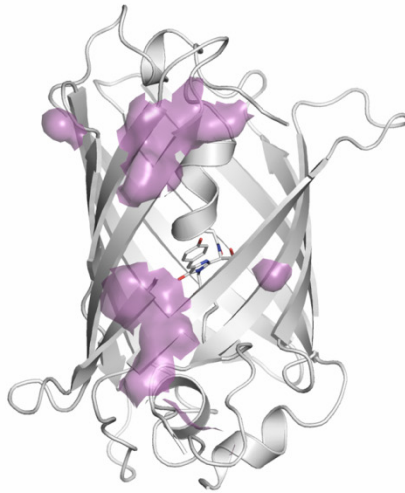

Ca<sup>2+</sup>-saturated monomer

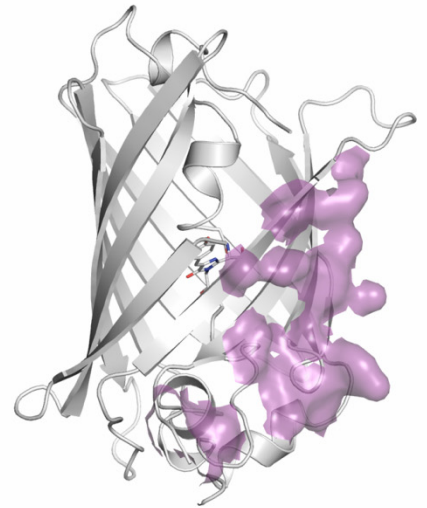

Ca<sup>2+</sup>-free GCaMP2

Fig. S8

A

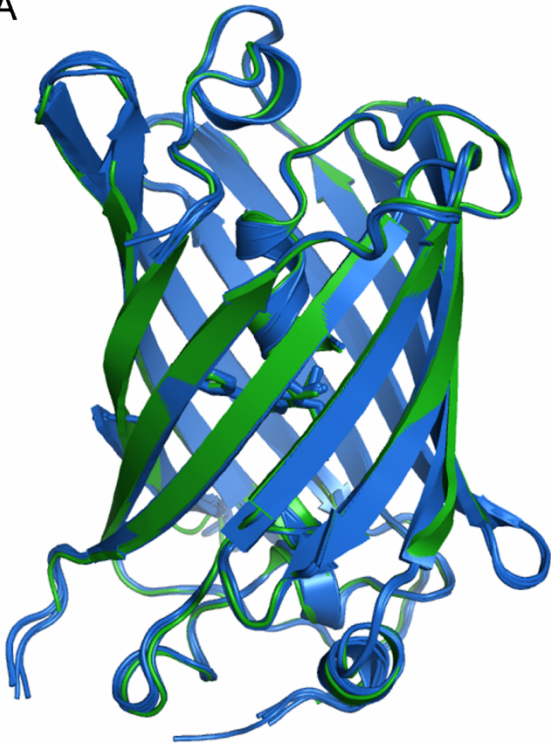

B

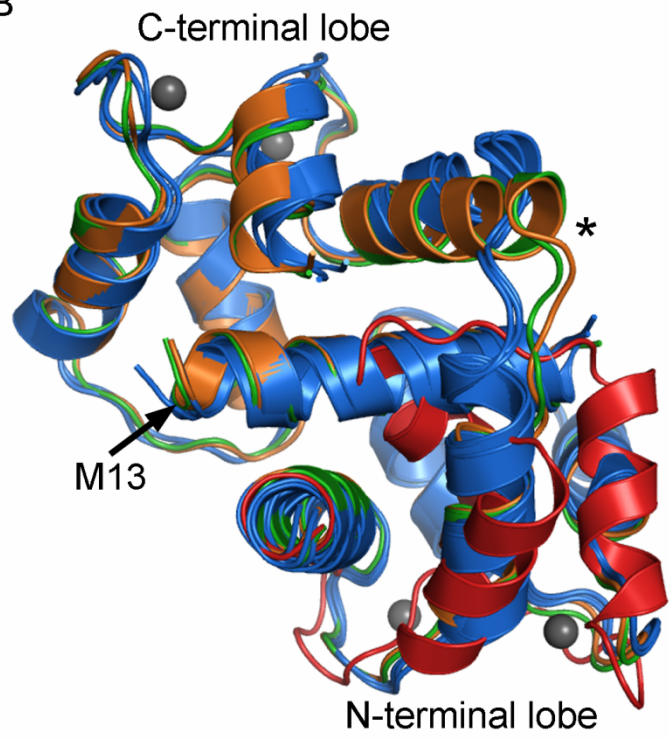

# Fig. S9

## T303W

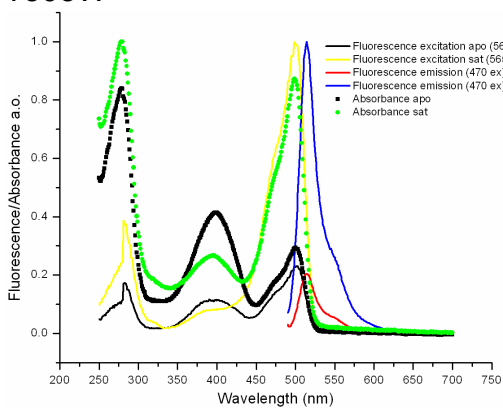

## T303Y

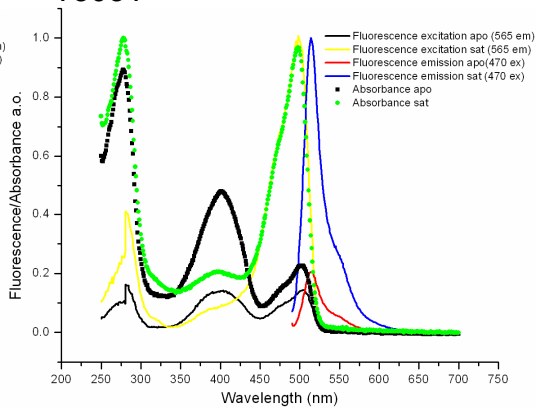

## T303R

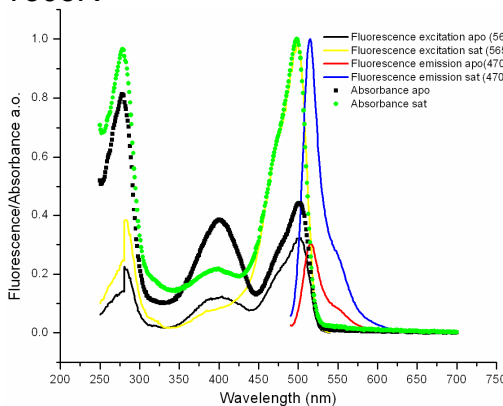

## D381W

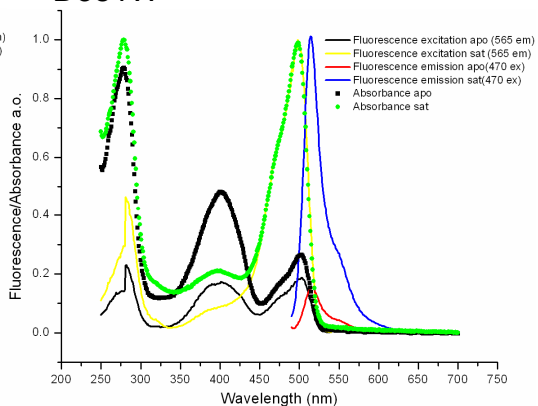

## D381Y

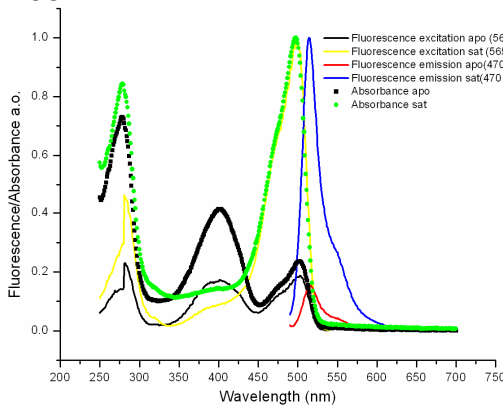

## D381R

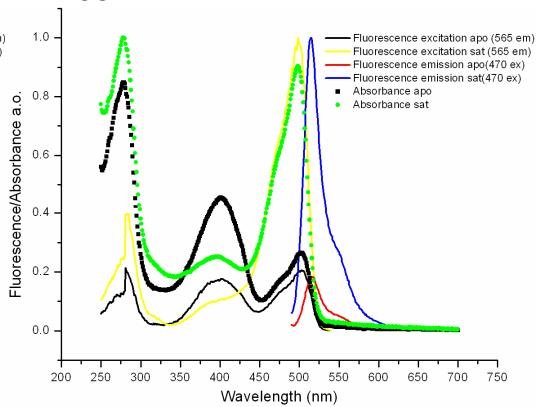



R81S

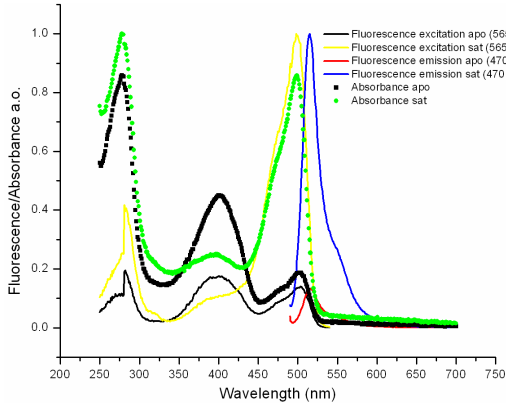

A140W

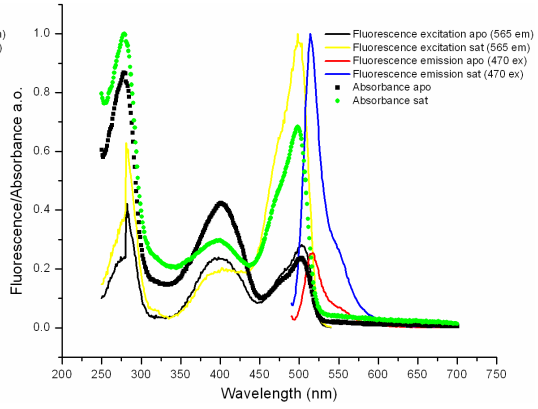

V219R

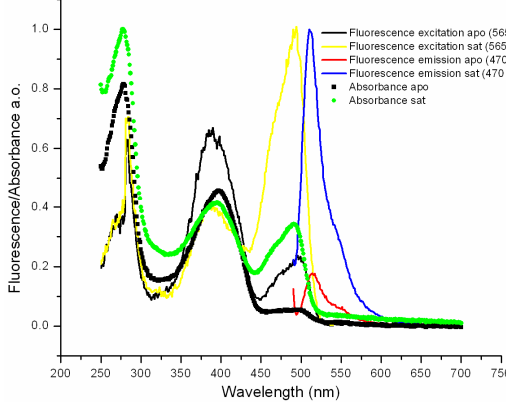

V219M

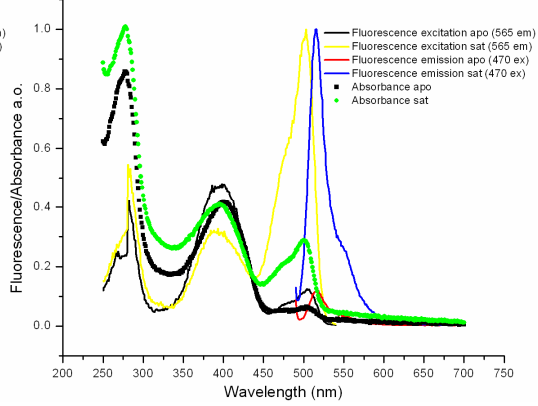

L120R

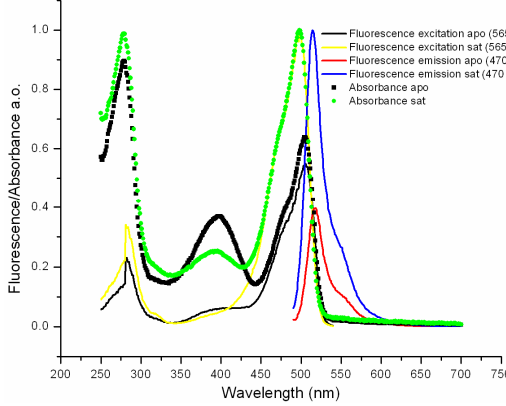

L120Y

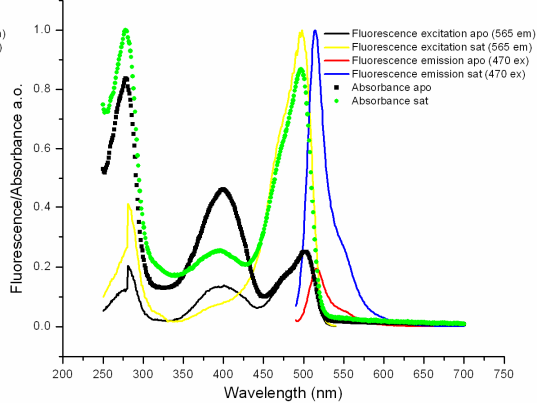

T116V

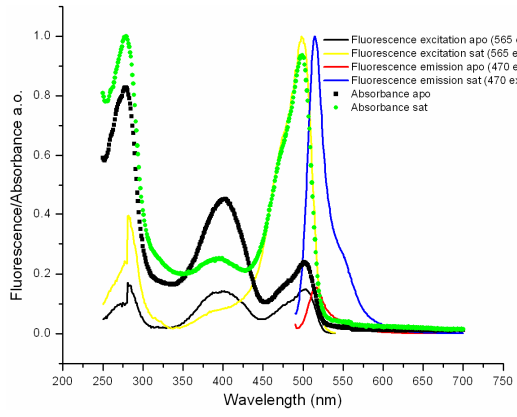

GCaMP2

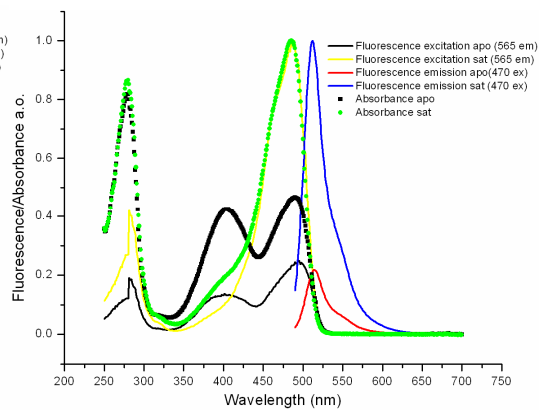

8-EF GCaMP2

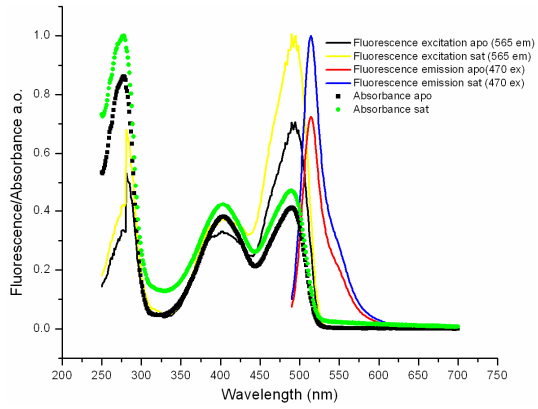

Fig. S10

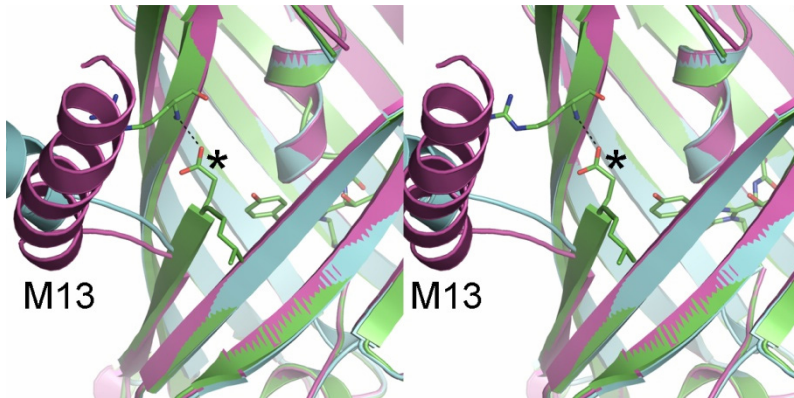

Supplement: M807657200_1.pdf [file M807657200_1.pdf]
